# Supplementary material
Source: publisher figshare collection journal article supplement (https://frontiersin.figshare.com/ndownloader/files/12453983)
Supplement: Supplementary file 1 [file 12453983]

## **Crop Heat Units (CHU) for Canada for Land Suitability Rating System (LSRS) and impacts of climate change**

Final Report for Agriculture and Agri-Food Canada Contract #3000321992 – ASSESSMENT OF CLIMATE CHANGE IMPACTS ON CANADIAN AGRICULTURAL LAND SUITABILITY: Modeling Corn & Canola Crops.

Prepared by: A. Bootsma, Agroclimatology Consultant, 27 Trimble Crescent, Ottawa, Ontario K2H 7M9. January, 2008.

### **Background:**

Crop Heat Units (CHU) are widely used in Canada to rate the suitability of the climate in each region for producing specific corn hybrids and soybean varieties (Brown and Bootsma, 1993; Bootsma et al., 1999; Bootsma et al., 2001) and are being used in the LSRS for Canada (Pettapiece and Tychon, 2007). An existing computer program (in C++ language) is available which calculates seasonal average CHU from 30 year monthly climate normals of daily maximum and minimum air temperature. The Brooks sine wave interpolation procedure is used (Brooks, 1943) to generate 365 daily values of average Tmax, Tmin and Tmean from 12 monthly average values (Subroutine DAILY). Daily average CHU are then computed from the 365 daily Tmax and Tmin values using the following formula (Brown and Bootsma, 1993):

$$\begin{aligned} Y_{\max} &= 3.33 (T_{\max} - 10.0) - 0.084 (T_{\max} - 10.0)^2 \\ Y_{\min} &= 1.8 (T_{\min} - 4.44) \\ \text{If } T_{\max} < 10.0, Y_{\max} &= 0.0; \text{ if } T_{\min} < 4.44, Y_{\min} = 0.0 \end{aligned}$$

Where Ymax and Ymin are the contributions to CHU from daily maximum (Tmax) and minimum (Tmin) air temperature respectively.

$$\text{Then,} \quad \text{Daily CHU} = (Y_{\max} + Y_{\min}) / 2.0$$

To compute seasonal CHU sums (CHUnormal), daily CHU values are accumulated from starting and stopping dates determined by the dates when certain temperature threshold values are reached. Starting dates are based on a threshold for the mean daily temperature (Tmean) and stopping dates are based on mean daily minimum temperature (Tmin). The threshold temperatures are “calibrated” to correspond closely to the average date of planting in spring and the date of 10% probability of occurrence of killing frost (-2°C) in the fall in each region. The fall cut-off date is appropriate for grain corn production. Cut-off dates for determining CHU available for silage corn are earlier, since killing frosts for silage would have occurred prior to this date

In past studies for Ontario, Quebec and the Maritimes, the threshold values used for Tmean and Tmin to determine starting and ending dates for accumulating CHU were as follows:

|            | Starting date<br>(Tmean) | Ending date<br>(Tmin) | Reference             |
|------------|--------------------------|-----------------------|-----------------------|
| Ontario:   | 12.8°C                   | 6.5°C                 | (Bootsma et al. 2004) |
| Quebec:    | 12.8°C                   | 6.5°C                 | (Bootsma et al. 1999) |
| Maritimes: | 11.0°C                   | 5.8°C                 | (Bootsma et al. 2001) |

Appropriate thresholds were not yet available for other regions of Canada and thus needed to be determined as part of this contract. Average accumulated CHU values (CHUnormal) determined by this procedure need to be adjusted to correspond with average CHU calculated from daily data for the 30 year period (CHUave) using a regression algorithm where available. Average CHU are used for mapping CHU available for corn and soybean production in most regions of Canada and are also used as a variable in the LSRS. CHU available at the 80% probability level (CHU80%) can also be estimated in a similar manner. CHU80% represents the CHU that are available at least 8 years out of 10. This value represent a lower level of risk for achieving adequate maturity levels in corn or soybeans than the average CHU. In Quebec, the 80% CHU value is used in mapping CHU for corn hybrid/soybean variety recommendations, i.e., corn hybrids of equivalent CHU rating may be expected to achieve adequate maturity at least 80% of the time (CRAAQ, 2002). The algorithms for computing CHUave and CHU80% are known and have been used in previous studies for Ontario, Quebec and the Maritime provinces. However, they also needed to be determined for the rest of Canada as part of this contract. The algorithms used to adjust the CHUnormal values in the past were as follows:

For Atlantic region:

$$\text{CHUave} = 185.2 + 0.93771 * \text{CHUnormal}$$

$$\text{CHU80\%} = -11.80 + 0.95382 * \text{CHUnormal}$$

For Quebec:

$$\text{CHUave} = 157.45 + 0.9194 * \text{CHUnormal}$$

$$\text{CHU80\%} = 37.55 + 0.9297 * \text{CHUnormal}$$

For Ontario:

$$\text{CHUave} = 177.82 + 0.91502 * \text{CHUnormal}$$

$$\text{CHU80\%} = 68.62 + 0.90195 * \text{CHUnormal}$$

### **Modified program for computing CHU:**

The procedures for calculating CHU variables in the C++ program were incorporated into the Java program for computing climate indices for the LSRS (CLIMATE INDICE TOOL for the LAND SUITABILITY RATING SYSTEM (LSRS) Version 1.0.0 Beta), and is available to run on-line at: <http://ncrxeis4.agr.gc.ca/LSRS/index.jsp>). Maximum flexibility for setting temperature threshold values and coefficients for the regression algorithms were achieved by reading these values from a spreadsheet (.xls) file for set ranges of latitude and longitude (used as the “threshold input” on the web site; see Table 4 for example). If the data are outside the latitude/longitude ranges on this file, the output record will not include any data for the CHU variables, but all the other LSRS variables that are selected will be computed. If the ranges overlap, an error message will result.

A “standard input” file of climate data is also required, which must be an ASCII text file containing longitude (negative decimal degrees), latitude, elevation (metres), 12 monthly Tmax values, 12 monthly Tmin values (°C), and 12 monthly precipitation values (mm). If the input text file is created using Excel spreadsheet, it needs to be saved as a Tab delimited txt file (\*.txt). The output file is saved (downloaded) as a .dbf file which can be converted to a spreadsheet file such as .xls, if the file is not too large.

### **Threshold temperature for starting CHU accumulations:**

To determine threshold temperatures for starting CHU accumulations, data on seeding dates of corn from field trials were gathered from as many locations as were readily available in the prairie region, British Columbia and Newfoundland. These dates were assumed to be fairly representative for seeding corn in each region. Average monthly air temperatures for the 1971-2000 normal period from climate stations in the vicinity of each field trial (Environment Canada, 2002a) were then used to generate average mean daily temperature for 365 days of the year (Tmean) using subroutine DAILY. The average temperature on the average seeding date was selected as the threshold temperature for starting CHU accumulations.

Data for seeding date temperature thresholds are presented in Table 1. Based on these results, appropriate threshold temperatures for each region are summarized as follows:

British Columbia: 12.7°C

Prairie Provinces: 11.2°C (note: although there were slight differences between provinces, it was thought best to use one threshold for Alberta, Saskatchewan and Manitoba to avoid discontinuity at the borders.)

Newfoundland: 8.8°C

### **Threshold temperature for ending CHU accumulations:**

Threshold temperatures for establishing ending dates for CHU accumulations were determined for each region/province by calculating the 10% probability date of first fall freeze (-2°C) for selected climate stations in each region, and comparing this date with the daily mean minimum air temperature (Tmin) generated from monthly climate normals. Average values of Tmin were then determined for each region/province. The results of these analyses are shown in Table 2.

Following the calculation of accumulated CHU using the above threshold temperatures, the ending dates and CHUnormal values were compared with values using the end date for accumulating EGDD (GDD2Stop). The accumulated CHUs using this method are labelled as ‘CHU2normal’ in the Java program output. GDD2Stop is an estimate of the average date of first fall frost (0°C) computed by the Java program. The results indicated that the end dates and CHU values were very close to a 1:1 relationship using these two methods (see Figures 1 to 4). Therefore, it was decided to use **CHU2normal** rather than CHUnormal as the CHU value for calculating CHUave and CHU80%. This eliminates the need for determining accurate threshold

temperatures for ending the accumulation of CHU in each region, and will provide more seamless coverage of results.

### **Coefficients for determining CHUave and CHU80%:**

CHUs computed from daily temperature data were examined for each region in Canada where coefficients have not yet been determined (BC, Prairie provinces, Nfld). These data were compared to CHU2normal values computed from monthly normals data for similar periods as the daily data. The monthly normals were first interpolated to daily normals using Subroutine DAILY. These comparisons facilitated the calculation of the required coefficients for computing CHUave and CHU80%.

### ***Coefficients for Prairie provinces***

Comparisons between CHU2normal and CHUave and CHU80% are presented in Table 3 and Figures 5 and 6. The prairie CHU values computed from daily data (CHUave and CHU80%) were derived from Master's thesis work done by Nadler (2007), using data from the 1971 to 2000 period. The linear regressions fits to the data in Figs. 5 and 6 indicate a high correlation so that these relationships can be used with a good deal of confidence. Nadler began each season from a modeled seeding date where the following conditions needed to be met: AWHC < 90% within top 5 cm, precipitation < 2.0 mm, and Tavg > 10°C for 10 days though not necessarily consecutively. If the modeled start date ended up later than June 6, then June 6 was used (crop insurance deadlines). End of season was triggered by first heavy frost where Tmin ≤ -2.2°C. CHU80% was calculated from the mean CHU and Standard deviation (Sd), assuming a normal distribution, since Nadler only published 75% and 90% risk values.

For the Prairie provinces, the regression equations used to estimate CHUave and CHU80% from the CHUnormal values were as follows:

$$\text{CHUave} = 212.93 + 0.9071 * \text{CHU2normal}$$

$$\text{CHU80\%} = 143.75 + 0.8436 * \text{CHU2normal}$$

### ***Coefficients for British Columbia***

Comparisons between CHU2normal and CHUave and CHU80% are shown in Table 3. Since relatively few locations were available for BC, the values were combined with prairie data to obtain the required regression constants and coefficients (Figures 7 and 8). Because of the small amount of data available for BC, less confidence can be put in these results compared to the prairie data. However, it is noted that the available BC data fitted well with the prairie results, but resulted in slightly lower estimates of CHUave and slightly higher values for CHU80%. It should be noted that the BC data is based on using an ending date that is appropriate for silage corn since grain trial data was not available for the province. The relationships for BC can be further validated or modified in future as more data becomes available.

For British Columbia, the regression equations used to estimate CHUave and CHU80% from the CHUnormal values were as follows:

$$\text{CHUave} = 343.24 + 0.8427 * \text{CHU2normal}$$

$$\text{CHU80\%} = 121.28 + 0.8545 * \text{CHU2normal}$$

### ***Coefficients for Newfoundland***

Comparisons between CHU2normal and CHUave and CHU80% are shown in Table 3. Since relatively few locations were available for Newfoundland, the values were combined with data from the three Maritime provinces to obtain the required regression constants and coefficients (Figures 9 and 10). Because of the small amount of data available for Newfoundland, less confidence can be put in these results compared to the Maritime data. However, it is noted that the available Newfoundland data fitted well with the Maritime results. In fact, the regression fit for CHUave resulted in almost identical values. For CHU80%, estimates were similar at CHU2normal values of about 2400, but at higher and lower CHU values, the Newfoundland estimates were somewhat higher and lower, respectively, than estimates based on the equation for the Maritimes. The relationships for Newfoundland can be further validated or modified in future as more data becomes available.

For the Newfoundland, the regression equations used to estimate CHUave and CHU80% from the CHU2normal values were as follows:

$$\text{CHUave} = 164.96 + 0.9465 * \text{CHU2normal}$$

$$\text{CHU80\%} = -207.54 + 1.0342 * \text{CHU2normal}$$

### **Input threshold file to program:**

Table 4 shows an example of an input file to the Java program containing the threshold temperatures and regression coefficients described in this report. This file can be readily modified to accommodate more area distinctions if necessary (latitudes and longitudes) or improved coefficients when these become available in future. The values shown in this table were used as input in the trial runs described below.

### **Output from Java program:**

The following variables (in addition to the variables described in previous reports) related to CHU are output from the Java program:

CHU2normal  
Start\_CHU  
Stop\_CHU  
CHU2normal  
CHUave  
CHU80  
GDD2Stop

CHU2normal are calculated based on ending dates computed from the threshold temperature for Tmin; Start\_CHU is the starting date for accumulating CHU based on the threshold temperature for Tmean; Stop\_CHU is the ending date for accumulating CHU2normal; CHU2normal is based on accumulating CHU to the ending date determined by the program (GDD2Stop); CHUave are the average CHU determined by adjusting CHU2normal using the regression equations; CHU80 is the CHU value equalled or exceeded 80% of the time, calculated from CHU2normal using the regression equations. GDD2Stop is the ending date for accumulating CHU2normal, based on the estimated average date of first fall frost (0°C) (also the ending date for accumulating GDD2 and EGDD values).

### **Analyses of CHU on gridded national data:**

The revised Java program was used to compute CHU for selected grids across Canada using climate normals for the baseline (1961 to 1990) and 2040 to 2069 period. The climate

change scenario was based on the output of the Canadian GCM (CGCM1 ga1). The threshold file shown in Table 4 was used as input for the temperature thresholds and regression coefficients. Results are presented in Tables 5, 6 and 7.

There are several points of interest to note from the results. Average values for the 21 locations for CHUnormal and CHU2normal were nearly identical (Tables 5 and 6). Average values for Stop\_CHU and GDD2Stop were identical for the 1961 to 1990 period (Table 5) and only different by one day for the 2040 to 2069 period (Table 6). This further confirms the validity of using GDD2Stop as the ending date for accumulating CHU.

Starting and ending dates averaged 17 days earlier and 14 days later, respectively, for the 2040 to 2069 period (Table 7). Average increases in CHUave and CHU80 were 743 and 726 CHU, respectively for the 2040 to 2069 period.

### **Conclusions:**

The CHU calculations using the modified Java program and the threshold input file from Table 4 will provide improved estimates of average CHU and CHU available at 80% probability level than are currently available for the Prairie provinces, British Columbia and Newfoundland. Further improvements may be made in future as more data becomes available for British Columbia and Newfoundland for calibrating the regression variables. CHU estimates for other regions of Canada (Ontario, Quebec and the Maritime provinces) use the same threshold temperatures and regression coefficients as in the earlier C++ program, and hence the values are not changed if the same climatic input data are used.

### **Acknowledgements:**

Many thanks to Steven Zimmer for undertaking the necessary computer programming work in an efficient manner and to Jamie Hewitt for his input into the direction of the work and this report.

### **References:**

- Brooks, C.E.P. 1943. Interpolation tables for daily values of meteorological elements. Quart. J. Royal Meteorol. Soc. 69: 160-162.
- Brown, D.M. and Bootsma, A. 1993. Crop heat units for corn and other warm-season crops in Ontario. Ontario Ministry of Agriculture and Food Factsheet No. 93-119, Agdex 111/31, 4pp.
- Bootsma, A. and Brown, D. M. 1995. Risk analyses of crop heat units available for corn and other warm-season crops in Ontario. Agric. & Agri-Food Canada, Research Branch, Centre for Land and Biological Resources Research, Ottawa, Tech. Bull.1995-1E. 83 pp. (CLBRR Contrib. No. 94-01).
- Bootsma, A., Tremblay, G. and Fillion, P. 1999. Risk analyses of heat units available for corn and soybean production in Quebec. Agriculture and Agri-Food Canada, Research Branch, Eastern Cereal and Oilseed Research Centre, Ottawa, Technical Bulletin, ECORC Contrib. No. 991396. 127 pp.
- Bootsma, A., Gameda, S. and McKenney, D.W. 2001. Adaptation of agricultural production to climate change in Atlantic Canada. Final Report for Climate Change Action Fund

- Project A214. Agriculture and Agri-Food Canada, Eastern Cereal and Oilseed Research Centre, Ottawa. 30pp.
- CRAAQ. 2002. Ré-évaluation des unités thermiques disponibles au Québec pour le Maïs et le Soya. Centre de Référence en Agriculture et Agroalimentaire du Québec, Sainte-Foy, Québec. G1V 2M2. 20 pp. To order, see:  
<http://www.craaq.qc.ca/Publications?p=32&l=fr&IdDoc=1186>
- Environment Canada. 2002a. Canadian Climate Normals or Averages 1971-2000. Meteorological Service of Canada, National Archive and Data Management Branch, Downsview, Ontario, Canada. [Online] Available:  
[http://www.climate.weatheroffice.ec.gc.ca/climate\\_normals/index\\_e.html](http://www.climate.weatheroffice.ec.gc.ca/climate_normals/index_e.html) [18 Apr. 2006].
- Kwabiah, A.B., MacPherson, M. and McKenzie, D.B. 2003. Corn heat unit variability and potential of corn (*Zea mays* L.) production in a cool climate ecosystem. *Can. J Plant Sci.* 83: 689-698.
- Nadler, A. 2007. An agroclimatic risk assessment of crop production on the Canadian Prairies. MSc. Thesis, Department of Soil Science, University of Manitoba, Winnipeg, Manitoba. 251 pp. Available online at:  
[http://mspace.lib.umanitoba.ca/bitstream/1993/2829/1/AgMEt\\_Thesis\\_Web\\_AN.pdf](http://mspace.lib.umanitoba.ca/bitstream/1993/2829/1/AgMEt_Thesis_Web_AN.pdf).
- Pettapiece, W.W. (Pettapiece Pedology), G. Tychon (Spatial Data Systems Consulting). 2007. Land Suitability Rating System Development: LSRS modifications to accommodate additional crops. Proto-type program developed and prepared in consultation with personnel from Research Branch, Agriculture and Agri-Food Canada, through a contract with the National Land and Water Information Service (NLWIS).

Table 1. Relationship between average seeding date of corn and average mean daily air Temperature (Tmean).

| Location         | Prov. | Average seeding date | # of years of field trial data | Average daily mean temperature (°C)* |
|------------------|-------|----------------------|--------------------------------|--------------------------------------|
| Abbotsford       | BC    | 15-May               | 8                              | 12.5                                 |
| Agassiz          | BC    | 08-May               | 8                              | 12.6                                 |
| Armstrong        | BC    | 11-May               | 5                              | 11.7                                 |
| Chilliwack       | BC    | 18-May               | 5                              | 13.5                                 |
| Saanich          | BC    | 17-May               | 4                              | 12.2                                 |
| Coldstream       | BC    | 20-May               | 3                              | 13.6                                 |
| BC Average:      |       |                      |                                | 12.7                                 |
| Lethbridge       | AB    | 08-May               | 6                              | 10.2                                 |
| Vauxhall         | AB    | 08-May               | 6                              | 11.0                                 |
| Brooks           | AB    | 13-May               | 6                              | 11.3                                 |
| Bow Island       | AB    | 13-May               | 6                              | 11.8                                 |
| Lacombe          | AB    | 16-May               | 4                              | 10.4                                 |
| AB Average:      |       |                      |                                | 10.9                                 |
| Outlook          | SK    | 18-May               | 4                              | 12.5                                 |
| Carman           | MB    | 06-May               | 3                              | 10.4                                 |
| Reinland         | MB    | 10-May               | 4                              | 11.9                                 |
| St Pierre        | MB    | 12-May               | 3                              | 11.3                                 |
| MB Average:      |       |                      |                                | 11.2                                 |
| Prairie average: |       |                      |                                | 11.2                                 |
| St John's        | NFLD  | 02-Jun               | n/a                            | 8.5                                  |
| Deer Lake        | NFLD  | 25-May               | n/a                            | 8.8                                  |
| Stephenville     | NFLD  | 26-May               | n/a                            | 9.2                                  |
| Nfld Average:    |       |                      |                                | 8.8                                  |

\* Based on 1971-2000 average, interpolated from monthly averages using subroutine DAILY

Source of field trial data:

i) BC = Pacific Field Corn Association Hybrid Evaluation Program. Available at: [www.farmwest.com](http://www.farmwest.com)

ii) AB and SK = Alberta Corn Committee Hybrid Corn Performance Trials. Available at:

<http://www.albertacorn.com>

iii) MB = Manitoba Corn Committee Corn Hybrid Performance Trials. Available at:

<http://www.gov.mb.ca/agriculture/crops/specialcrops>

iv) Nfld seeding dates are taken from Kwabiah et al., 2003.



Table 2. Relationship between date of 10% probability of occurrence of -2°C and the average mean daily minimum air temperature (Tmin).

| MSC<br>Station # | Station name       | Prov | 10% probability<br>of -2°C | Average<br>Tmin (°C) |
|------------------|--------------------|------|----------------------------|----------------------|
| 1021830          | Comox A            | BC   | 29-Oct                     | 4.0                  |
| 1016940          | Saanichton CDA     | BC   | 5-Nov                      | 4.5                  |
| 1100030          | Abbotsford A       | BC   | 30-Oct                     | 3.7                  |
| 1100120          | Agassiz CDA        | BC   | 31-Oct                     | 4.7                  |
| 1108447          | Vancouver Int A    | BC   | 31-Oct                     | 4.5                  |
| 1123970          | Kelowna A          | BC   | 18-Sep                     | 5.1                  |
| 1125760          | Oliver             | BC   | 27-Sep                     | 5.3                  |
| 1126510          | Princeton A        | BC   | 15-Sep                     | 4.5                  |
| 1163780          | Kamloops A         | BC   | 4-Oct                      | 5.1                  |
| 1183000          | Fort St John A     | BC   | 12-Sep                     | 5.1                  |
| 1192940          | Fort Nelson A      | BC   | 6-Sep                      | 4.9                  |
| 1096450          | Prince George A    | BC   | 8-Sep                      | 4.8                  |
| 1127800          | Summerland CDA     | BC   | 18-Oct                     | 3.7                  |
|                  |                    |      | AVERAGE:                   | 4.6                  |
| 3033890          | Lethbridge CDA     | AB   | 16-Sep                     | 5.0                  |
| 3023720          | Lacombe CDA        | AB   | 6-Sep                      | 4.6                  |
| 3012205          | Edmonton A         | AB   | 6-Sep                      | 5.0                  |
| 3072920          | Grande Prairie A   | AB   | 8-Sep                      | 4.9                  |
| 3032800          | Gleichen           | AB   | 6-Sep                      | 5.2                  |
|                  |                    |      | AVERAGE:                   | 4.9                  |
| 4016560          | Regina A           | SK   | 13-Sep                     | 5.1                  |
| 4057120          | Saskatoon A        | SK   | 15-Sep                     | 4.4                  |
| 4020160          | Aneroid            | SK   | 9-Sep                      | 5.4                  |
| 4047240          | Scott CDA          | SK   | 7-Sep                      | 5.2                  |
| 4055085          | Melfort CDA        | SK   | 8-Sep                      | 5.8                  |
| 4019080          | Yorkton            | SK   | 10-Sep                     | 5.4                  |
| 4012400          | Estevan A          | SK   | 14-Sep                     | 5.6                  |
|                  |                    |      | AVERAGE:                   | 5.3                  |
| 5010760          | Deloraine          | MB   | 12-Sep                     | 6.4                  |
| 5010480          | Brandon A          | MB   | 12-Sep                     | 5.0                  |
| 5022780          | Steinbach          | MB   | 13-Sep                     | 6.3                  |
| 5021848          | Morden CDA         | MB   | 22-Sep                     | 6.1                  |
| 5052880          | The Pas A          | MB   | 14-Sep                     | 5.2                  |
| 5040680          | Dauphin A          | MB   | 12-Sep                     | 5.6                  |
|                  |                    |      | AVERAGE:                   | 5.8                  |
| 8401300          | Corner Brook       | NFLD | 13-Oct                     | 4.1                  |
| 8401501          | Deer Lake A        | NFLD | 13-Sep                     | 5.5                  |
| 8401700          | Gander Int'l A     | NFLD | 8-Oct                      | 3.1                  |
| 8402050          | Grand Falls        | NFLD | 5-Oct                      | 3.5                  |
| 8403600          | ST John's West CDA | NFLD | 12-Oct                     | 4.2                  |
| 8403506          | ST John's A        | NFLD | 14-Oct                     | 3.4                  |
| 8402975          | Port Aux Basques   | NFLD | 26-Oct                     | 2.3                  |
| 8403800          | Stephenville A     | NFLD | 21-Oct                     | 2.5                  |
| 8400650          | Botwood            | NFLD | 3-Oct                      | 4.5                  |
|                  |                    |      | AVERAGE:                   | 3.7                  |

Table 3. Comparisons between CHU2normal, CHUave and CHU80% for various locations in Canada.

| STATION NAME       | PROV | STN #   | CHU2normal | CHUave | Sd    | CHU80% | Period    |
|--------------------|------|---------|------------|--------|-------|--------|-----------|
| Lethbridge CDA     | AB   | 3033890 | 2366       | 2363   | 259.0 | 2145   | 1971-2000 |
| Lacombe CDA        | AB   | 3023720 | 1755       | 1778   | 201.0 | 1609   | 1971-2000 |
| Edmonton A         | AB   | 3012205 | 1837       | 1874   | 232.4 | 1678   | 1971-2000 |
| Grande Prairie A   | AB   | 3072920 | 1836       | 1850   | 249.6 | 1640   | 1971-2000 |
| Gleichen           | AB   | 3032800 | 1994       | 2025   | 261.4 | 1805   | 1971-2000 |
| Regina A           | SK   | 4016560 | 2344       | 2364   | 266.4 | 2140   | 1971-2000 |
| Saskatoon A        | SK   | 4057120 | 2244       | 2309   | 250.5 | 2098   | 1971-2000 |
| Aneroid            | SK   | 4020160 | 2309       | 2335   | 257.4 | 2118   | 1971-2000 |
| Scott CDA          | SK   | 4047240 | 2048       | 2052   | 212.6 | 1873   | 1971-2000 |
| Melfort CDA        | SK   | 4055085 | 2119       | 2117   | 243.4 | 1912   | 1971-2000 |
| Yorkton A          | SK   | 4019080 | 2143       | 2170   | 239.7 | 1968   | 1971-2000 |
| Outlook PFRA       | SK   | 4055736 | 2429       | 2424   | 230.0 | 2230   | 1971-2000 |
| Deloraine          | MB   | 5010760 | 2582       | 2512   | 325.1 | 2238   | 1971-2000 |
| Brandon A          | MB   | 5010480 | 2198       | 2270   | 248.3 | 2061   | 1971-2000 |
| Steinbach          | MB   | 5022780 | 2432       | 2443   | 246.0 | 2236   | 1971-2000 |
| Morden CDA         | MB   | 5021848 | 2833       | 2732   | 296.4 | 2483   | 1971-2000 |
| The Pas A          | MB   | 5052880 | 2017       | 2017   | 211.9 | 1839   | 1971-2000 |
| Dauphin A          | MB   | 5040680 | 2215       | 2211   | 246.1 | 2004   | 1971-2000 |
| Chilliwack         | BC   | 1101530 | 2614       | 2451   | N/A   | N/A    | 1999-2003 |
| Saanichton CDA     | BC   | 1016940 | 2452       | 2359   | N/A   | N/A    | 1999-2002 |
| Abbotsford A       | BC   | 1100030 | 2664       | 2536   | N/A   | 2410   | 1999-2006 |
| Agassiz CDA        | BC   | 1100120 | 2774       | 2668   | N/A   | 2506   | 1999-2006 |
| Deer Lake          | NFLD | 8401500 | 1920       | 2010   | N/A   | 1770   | 1945-2001 |
| Stephenville A     | NFLD | 8403800 | 1978       | 2084   | N/A   | 1874   | 1945-2001 |
| St John's West CDA | NFLD | 8403600 | 1803       | 1780   | N/A   | 1515   | 1945-2001 |
| Deer Lake          | NFLD | 8401500 | 2059       | 2125   | N/A   | 1885   | 1990-2001 |
| Stephenville A     | NFLD | 8403800 | 2051       | 2109   | N/A   | 1860   | 1990-2001 |
| St John's West CDA | NFLD | 8403600 | 2055       | 2135   | N/A   | 2000   | 1990-2001 |

Sources:

CHU2normal is computed using the Java program and climate normals for periods indicated, except for BC where they were computed manually from average seeding to harvest dates in silage trials using spreadsheets.

For Prairies, CHUave, and Standard deviation (Sd) and CHU80% values are from Nadler, 2007; CHU80% was computed assuming a normal distribution.

For BC, CHUave were computed from silage trial data available at <http://farmwest.com> ;

CHU80% were estimated from short term data and are therefore only approximate.

For Newfoundland, CHUave and CHU80% were taken from Kwabiah et al., 2003

Table 4: Example of input threshold file for calculating Crop Heat Units (CHU)

| Latitude range |         | Longitude range |         | Start temp. | Stop temp. | CHU ave  |        | CHU 80%  |        |
|----------------|---------|-----------------|---------|-------------|------------|----------|--------|----------|--------|
| Minimum        | Maximum | Minimum         | Maximum |             |            | Constant | Coeff. | Constant | Coeff. |
| 46.000         | 66.00   | -59.5           | -51.00  | 8.8         | 3.7        | 164.96   | 0.9465 | -207.54  | 1.0342 |
| 42.000         | 47.95   | -68.0           | -59.50  | 11.0        | 5.8        | 185.20   | 0.9377 | -11.80   | 0.9538 |
| 44.000         | 47.95   | -74.0           | -68.05  | 12.8        | 6.5        | 157.45   | 0.9194 | 37.55    | 0.9297 |
| 47.951         | 66.00   | -79.0           | -59.55  | 12.8        | 6.5        | 157.45   | 0.9194 | 37.55    | 0.9297 |
| 40.000         | 47.95   | -95.0           | -74.01  | 12.8        | 6.5        | 177.82   | 0.9150 | 68.62    | 0.9020 |
| 47.951         | 66.00   | -95.0           | -79.01  | 12.8        | 6.5        | 177.82   | 0.9150 | 68.62    | 0.9020 |
| 48.000         | 66.00   | -101.5          | -95.01  | 11.2        | 5.8        | 212.93   | 0.9071 | 143.75   | 0.8436 |
| 48.000         | 66.00   | -110.0          | -101.51 | 11.2        | 5.3        | 212.93   | 0.9071 | 143.75   | 0.8436 |
| 48.000         | 52.00   | -115.0          | -110.01 | 11.2        | 4.9        | 212.93   | 0.9071 | 143.75   | 0.8436 |
| 52.001         | 66.00   | -120.0          | -110.01 | 11.2        | 4.9        | 212.93   | 0.9071 | 143.75   | 0.8436 |
| 48.000         | 52.00   | -136.0          | -115.01 | 12.7        | 4.6        | 343.24   | 0.8427 | 121.28   | 0.8545 |
| 52.001         | 66.00   | -140.0          | -120.01 | 12.7        | 4.6        | 343.24   | 0.8427 | 121.28   | 0.8545 |

Table 5. Results of CHU calculations by revised Java program for 21 selected grid locations across Canada, using 1961 to 1990 climate normals.

| Approx. location | Grid point co-ordinates |        |          |       | 1961 to 1990 data |           |          |          |            |        |       |
|------------------|-------------------------|--------|----------|-------|-------------------|-----------|----------|----------|------------|--------|-------|
|                  | Prov                    | Lat.   | Long.    | Elev. | CHUnormal         | Start_CHU | Stop_CHU | GDD2Stop | CHU2normal | CHUave | CHU80 |
| Vancouver        | BC                      | 49.264 | -123.042 | 58    | 2855              | 138       | 307      | 306      | 2853       | 2748   | 2560  |
| Oliver           | BC                      | 49.125 | -119.569 | 294   | 2875              | 132       | 275      | 267      | 2779       | 2685   | 2496  |
| Fort Nelson      | BC                      | 58.847 | -122.625 | 339   | 1653              | 154       | 250      | 246      | 1613       | 1703   | 1500  |
| Lethbridge       | AB                      | 49.681 | -112.764 | 909   | 2233              | 136       | 257      | 261      | 2278       | 2279   | 2066  |
| Edmonton         | AB                      | 53.292 | -113.597 | 713   | 1989              | 137       | 254      | 258      | 2028       | 2052   | 1854  |
| Fort Vermillion  | AB                      | 58.431 | -116.097 | 271   | 1874              | 140       | 249      | 244      | 1819       | 1863   | 1678  |
| Mankota          | SK                      | 49.125 | -107.069 | 855   | 2000              | 139       | 246      | 245      | 1985       | 2013   | 1818  |
| Prince Albert    | SK                      | 53.153 | -105.681 | 433   | 2064              | 136       | 250      | 245      | 2000       | 2027   | 1831  |
| Brandon          | MB                      | 49.819 | -99.986  | 396   | 2393              | 135       | 256      | 253      | 2353       | 2348   | 2129  |
| Flin Flon        | MB                      | 54.681 | -101.653 | 302   | 1968              | 146       | 256      | 255      | 1960       | 1991   | 1798  |
| Churchill        | MB                      | 58.708 | -94.014  | 4     | 377               | 204       | 234      | 240      | 423        | 565    | 450   |
| Harrow           | ON                      | 42.042 | -82.903  | 185   | 3781              | 128       | 292      | 300      | 3831       | 3683   | 3524  |
| Ottawa           | ON                      | 45.514 | -75.681  | 104   | 2623              | 139       | 266      | 266      | 2623       | 2578   | 2435  |
| Kapuskasing      | ON                      | 49.403 | -82.486  | 214   | 1630              | 159       | 249      | 250      | 1642       | 1680   | 1550  |
| Huntingdon       | QC                      | 45.097 | -74.153  | 47    | 3011              | 134       | 274      | 275      | 3021       | 2942   | 2794  |
| Normandin        | QC                      | 48.847 | -72.486  | 120   | 1890              | 153       | 253      | 254      | 1901       | 1906   | 1805  |
| Fredericton      | NB                      | 45.931 | -66.653  | 98    | 2513              | 137       | 267      | 263      | 2467       | 2498   | 2341  |
| Halifax          | NS                      | 44.681 | -63.458  | 12    | 2517              | 145       | 282      | 283      | 2524       | 2552   | 2396  |
| Sydney           | NS                      | 46.208 | -60.125  | 20    | 2141              | 157       | 279      | 284      | 2172       | 2222   | 2060  |
| Charlottetown    | PEI                     | 46.208 | -63.181  | 2     | 2528              | 144       | 279      | 281      | 2542       | 2569   | 2413  |
| St. John's       | NFLD                    | 47.458 | -52.764  | 81    | 1831              | 153       | 290      | 284      | 1820       | 1888   | 1675  |
| AVERAGE:         |                         |        |          |       | 2226              | 145       | 265      | 265      | 2221       | 2228   | 2056  |

Table 6. Results of CHU calculations by revised Java program for 21 selected grid locations across Canada for the 2040-2069 period scenario (CGCMi ga1).

| Approx.<br>location | Prov | 2040 to 2069 data |           |          |          |            |        |       |
|---------------------|------|-------------------|-----------|----------|----------|------------|--------|-------|
|                     |      | CHUnormal         | Start_CHU | Stop_CHU | GDD2Stop | CHU2normal | CHUave | CHU80 |
| Vancouver           | BC   | 3929              | 112       | 324      | 324      | 3929       | 3655   | 3479  |
| Oliver              | BC   | 3814              | 109       | 289      | 280      | 3719       | 3477   | 3299  |
| Fort Nelson         | BC   | 2533              | 131       | 261      | 258      | 2505       | 2454   | 2262  |
| Lethbridge          | AB   | 3413              | 106       | 280      | 276      | 3363       | 3263   | 2981  |
| Edmonton            | AB   | 2997              | 113       | 268      | 272      | 3034       | 2965   | 2703  |
| Fort Vermillion     | AB   | 2644              | 127       | 263      | 258      | 2595       | 2567   | 2333  |
| Mankota             | SK   | 3001              | 109       | 259      | 258      | 2986       | 2922   | 2663  |
| Prince Albert       | SK   | 2885              | 124       | 265      | 259      | 2808       | 2760   | 2513  |
| Brandon             | MB   | 3442              | 107       | 270      | 264      | 3357       | 3258   | 2976  |
| Flin Flon           | MB   | 2698              | 138       | 269      | 267      | 2682       | 2646   | 2406  |
| Churchill           | MB   | 1390              | 165       | 253      | 258      | 1414       | 1471   | 1344  |
| Harrow              | ON   | 4671              | 115       | 302      | 310      | 4740       | 4515   | 4344  |
| Ottawa              | ON   | 3406              | 128       | 280      | 282      | 3426       | 3313   | 3159  |
| Kapuskasing         | ON   | 2413              | 144       | 265      | 268      | 2442       | 2413   | 2272  |
| Huntingdon          | QC   | 3794              | 124       | 287      | 289      | 3812       | 3666   | 3507  |
| Normandin           | QC   | 2620              | 141       | 267      | 271      | 2659       | 2603   | 2510  |
| Fredericton         | NB   | 3206              | 127       | 280      | 276      | 3162       | 3150   | 3004  |
| Halifax             | NS   | 3142              | 136       | 293      | 295      | 3156       | 3145   | 2998  |
| Sydney              | NS   | 2733              | 146       | 292      | 296      | 2756       | 2770   | 2617  |
| Charlottetown       | PEI  | 3190              | 135       | 291      | 292      | 3196       | 3183   | 3037  |
| St. John's          | NFLD | 2152              | 146       | 299      | 292      | 2142       | 2193   | 2008  |
| AVERAGE:            |      | 3051              | 128       | 279      | 278      | 3042       | 2971   | 2782  |

Table 7. Difference in CHU variables between 2040 to 2069 and 1961 to 1990 periods.

| Approx.<br>location | Prov | Difference (2040 to 2069 minus 1961 to 1990) |          |        |       |
|---------------------|------|----------------------------------------------|----------|--------|-------|
|                     |      | Start_CHU                                    | GDD2Stop | CHUave | CHU80 |
| Vancouver           | BC   | -26                                          | 18       | 907    | 919   |
| Oliver              | BC   | -23                                          | 13       | 792    | 803   |
| Fort Nelson         | BC   | -23                                          | 12       | 752    | 762   |
| Lethbridge          | AB   | -30                                          | 15       | 984    | 915   |
| Edmonton            | AB   | -24                                          | 14       | 913    | 849   |
| Fort Vermillion     | AB   | -13                                          | 14       | 705    | 655   |
| Mankota             | SK   | -30                                          | 13       | 908    | 845   |
| Prince Albert       | SK   | -12                                          | 14       | 733    | 681   |
| Brandon             | MB   | -28                                          | 11       | 911    | 847   |
| Flin Flon           | MB   | -8                                           | 12       | 655    | 609   |
| Churchill           | MB   | -39                                          | 18       | 907    | 894   |
| Harrow              | ON   | -13                                          | 10       | 832    | 820   |
| Ottawa              | ON   | -11                                          | 16       | 735    | 724   |
| Kapuskasing         | ON   | -15                                          | 18       | 732    | 722   |
| Huntingdon          | QC   | -10                                          | 14       | 723    | 713   |
| Normandin           | QC   | -12                                          | 17       | 697    | 705   |
| Fredericton         | NB   | -10                                          | 13       | 652    | 663   |
| Halifax             | NS   | -9                                           | 12       | 592    | 602   |
| Sydney              | NS   | -11                                          | 12       | 548    | 558   |
| Charlottetown       | PEI  | -9                                           | 11       | 614    | 624   |
| St. John's          | NFLD | -7                                           | 8        | 305    | 333   |
|                     |      | -17                                          | 14       | 743    | 726   |

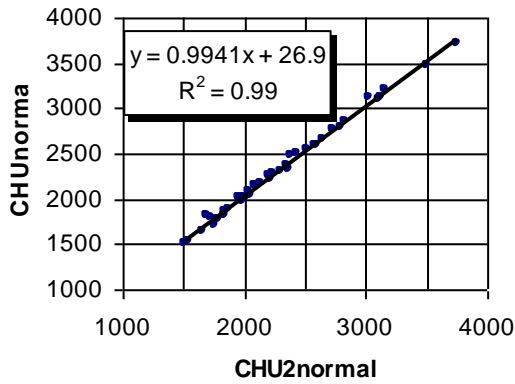

Figure 1. Comparison of CHU2normal with CHUnorma using data from 44 climate stations across Canada (1971-2000 normals).

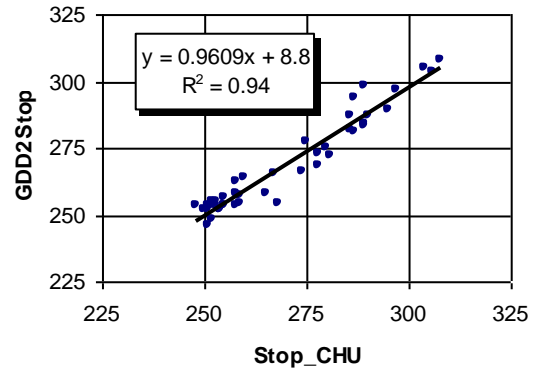

Figure 2. Comparison of two ending dates using data from 44 climate stations across Canada (1971-2000 normals).

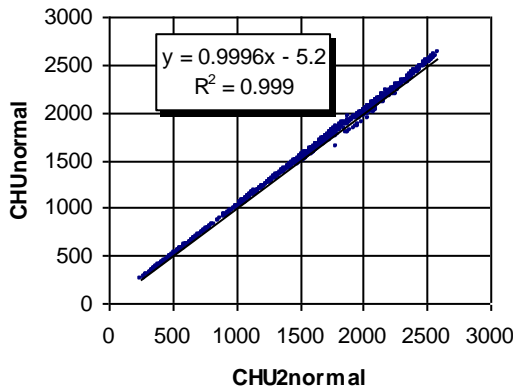

Figure 3. Comparison of CHU2normal with CHUnormal using gridded prairie strip data (1263 grid points from 49 to 65°N, 109 to 11°W) for 1961 to 1990 period.

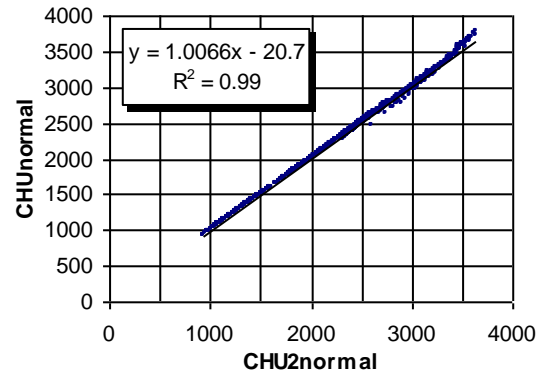

Figure 4. Comparison of CHU2normal with CHUnormal using gridded prairie strip data (1320 grid points from 49 to 65°N, 109 to 11°W) for 2040 to 2069 period (CGCM1 ga1 scenario).

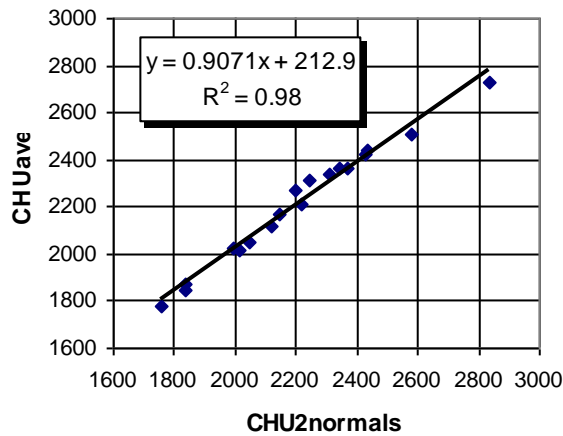

Figure 5. CHUave versus CHU2normals for Prairie provinces, 1971 to 2000 station data.

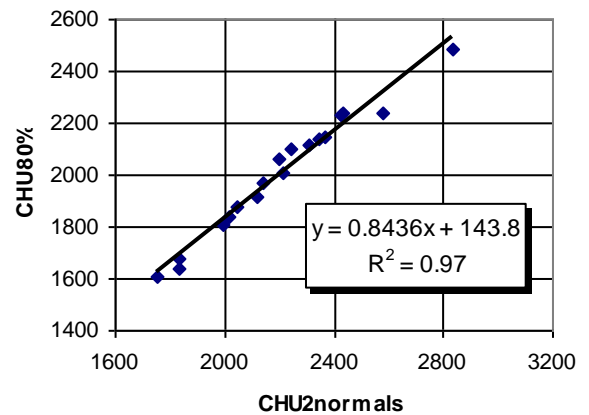

Figure 6. CHU80% versus CHU2normals for Prairie provinces, 1971 to 2000 station data.

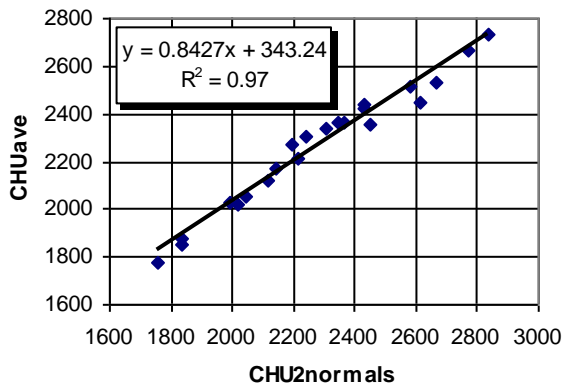

Figure 7. CHUave versus CHU2normals for British Columbia (including Prairie data).

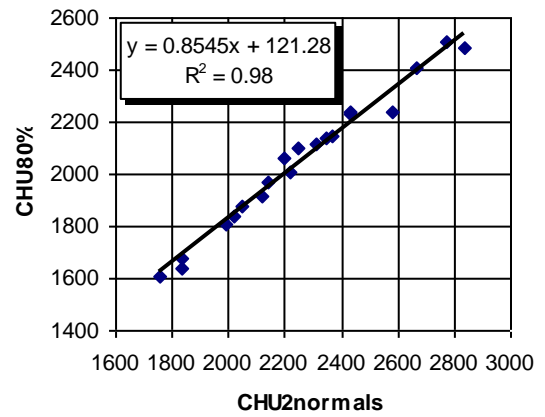

Figure 8. CHU80% versus CHU2normals for British Columbia (including Prairie data).

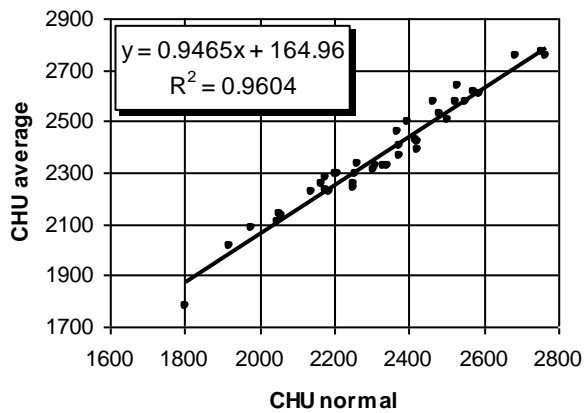

Figure 9. CHUave versus CHU2normals for Newfoundland (including Maritime provinces data).

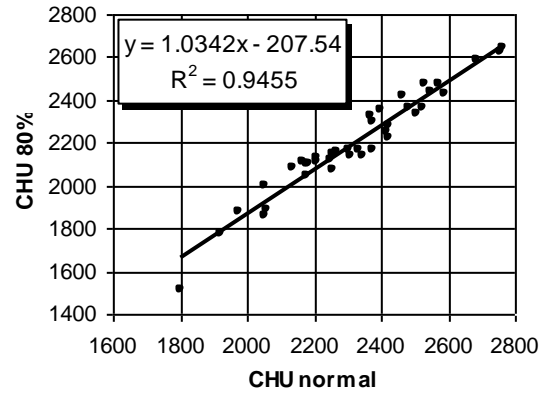

Figure 10. CHU80% versus CHU2normals for Newfoundland (including Maritime provinces data).
